# Supplementary material
Source: MDPI journal article supplement (https://www.mdpi.com/2413-4155/3/4/40)
Supplement: s1 [file s1]

# **Association Between Transcription Factor 7-Like-2 Polymorphisms and Type 2 Diabetes Mellitus in a Ghanaian Population**

## **Supplementary Appendix 1**

### **Text Summary**

The supplementary material contains detailed information on the modified and simplified salting-out technique for DNA extraction (pp.2-3). Quality control and troubleshooting procedures for the genotyping of the SNPs have been shown on page 4-5. Figure S1 and S2 shows the results of DNA purity and concentrations. Figure S3 and S4 demonstrate the genotyping results of the two SNPs. Table S1 shows the recipe of the master mix for Quality Control and trouble shooting. Table S2-S5 shows the association between rs12255372 and rs7903146 with cardiometabolic risk factors in both cases and control participants. Supplementary appendix two shows details of logistic regression models used to examine associations.

All images are in Joint Photographic Experts Group (Jpeg) format.

## **Modified Salting-Out Non-enzymatic DNA extraction Method**

### **Erythrocyte Lysis Buffer**

Add 9 volume of 0.155M  $\text{NH}_4\text{Cl}$  (8.291g  $\text{NH}_4\text{Cl}$  into 1L  $\text{dH}_2\text{O}$ ) to 1 volume of 0.17M Tris HCL (pH= 7.65)

### **Wash Buffer**

Mix 5 ml of 1.0M NaCl and 10 ml of 0.5M EDTA (pH=8.0) into 985 mL  $\text{dH}_2\text{O}$

### **TKM 2 (High salt buffer) Preparation (100 ml)**

0.121g of Tris HCL (10mM, pH=7.6), 0.074g of KCl (10mM), 1.203g of  $\text{MgCl}_2$  (10mM), 0.074g of EDTA (2mM), 0.467g of NaCl (0.4M) is dissolved in 100ml of  $\text{dH}_2\text{O}$ .

### **Saturated Sodium chloride (6M NaCl) solution**

Dissolve 8.765g of NaCl in 25 ml of  $\text{dH}_2\text{O}$

### **Steps**

In a nuclease-free tube (Eppendorf Tube) add 3:1 ratio of Erythrocyte Lysis Buffer to whole blood sample (at 37 °C temperature). Incubate the mixture for 5 minutes. Centrifuge the mixture at 8000 rpm for 3 minutes. Discard the supernatant and keep the sediment. To ensure complete removal of haemoglobin stain, add 600  $\mu\text{l}$  of wash buffer to the sediment and centrifuge the mixture at low speed (6000 rpm) for 5 minutes. Discard the supernatant. Resuspend the white cell pellet with 300  $\mu\text{l}$  of TKM-2 buffer and add 40  $\mu\text{l}$  of 10% SDS. Mix thoroughly by 30-secs vortexing and incubate at 37 °C for 5 minutes. At the end of the incubation, add 100  $\mu\text{l}$  of 6M NaCl and vortex for 15 seconds to precipitate the proteins and leave DNA out in solution. Centrifuge the content at 8000 rpm for 5 minutes. Transfer the supernatant into a new Eppendorf tube containing 300  $\mu\text{l}$  of absolute isopropanol (99.9%). Invert the tube slowly several times to precipitate DNA. Centrifuge at 8000 rpm for 10 minutes to pellet down the precipitated DNA. Discard the supernatant and add 70% isopropanol, mix slowly to remove any excess salts. Final centrifugation is conducted at 8000 rpm for 5 minutes to pellet down the DNA. Discard the supernatant. Place Eppendorf tube downward on the tissue paper to drain the ethanol completely. Air-dry the DNA and after thorough drying, add 50  $\mu\text{l}$  of nuclease-free water buffer to dissolve the DNA.

## Results visualisation of DNA products isolated with MSO method

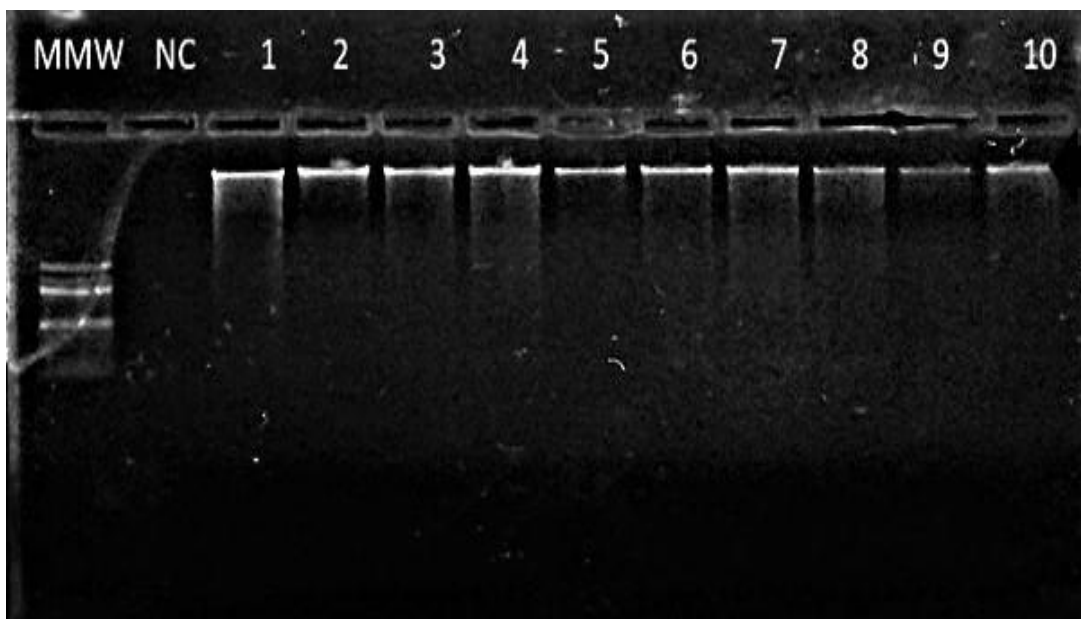

Figure S1: 1% agarose gel electrophoresis of genomic DNA extracted from MSO method

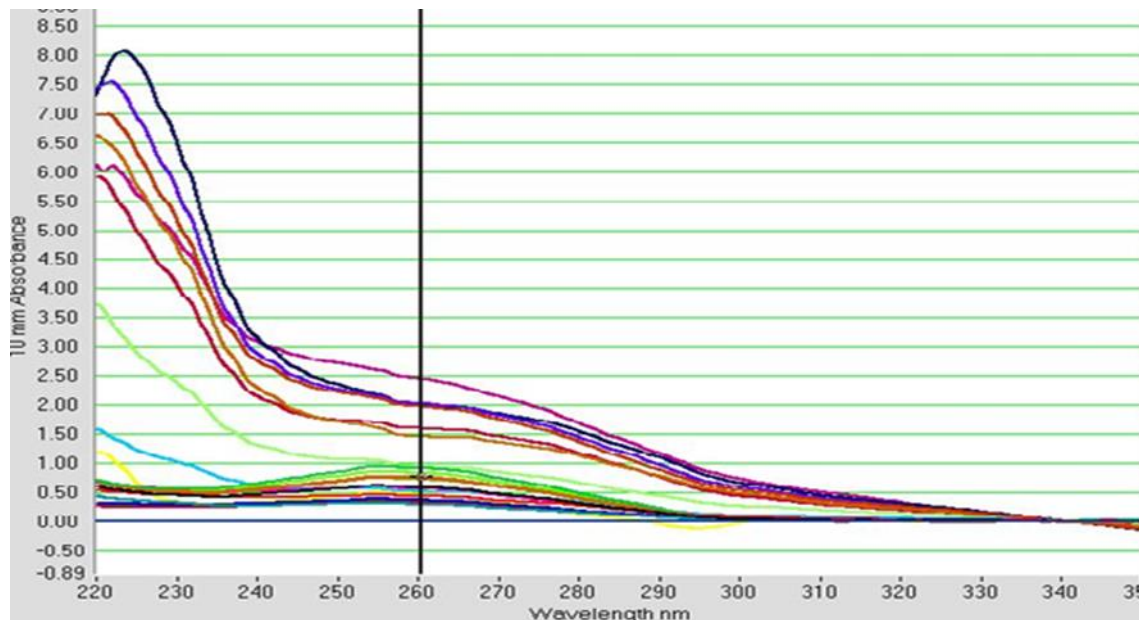

Figure S2: A typical Nanodrop curve of absorbance against the path of light travel (wavelength)

## MTPA Quality control and Trouble Shooting

The optimization step of the MTPA solely depends on the primer concentration. Where appropriate, increase the Mg<sup>++</sup> concentration of the commercially prepared OneTaq® 2X Master Mix (New England Biolabs) by 0.2 µM during the optimization step.

### Amplification of common product

Amplification of common primers was performed in a total volume of 25µL containing ≥50 ng of DNA template, 0.4 µM each of forward and reverse outer primers and 1X of OneTaq® 2X Master Mix (New England Biolabs).

### MTPA reaction

#### Allele-specific Amplification

Forward outer vs reverse inner primers; and Forward inner vs reverse outer primer combinations were used to optimise the allele-specific amplification conditions. The reaction was completed with 0.4 µM each of forward-outer vs reverse-inner primers in 25 uL reaction volume using the 1X of OneTaq® 2X Master Mix (New England Biolabs).

**Table S1: Recipe for the master mix for Quality Control**

| Component                                | Initial Conc. | Final conc. | Volume (µL)<br>Per Sample |
|------------------------------------------|---------------|-------------|---------------------------|
| <b>Amplification of common Primers</b>   |               |             |                           |
| <b>FOP</b>                               | 10 µM         | 0.4 µM      | 1                         |
| <b>ROP</b>                               | 10 µM         | 0.4 µM      | 1                         |
| <b>MTPA reaction</b>                     |               |             |                           |
| <b>FIP</b>                               | 10 µM         | 0.2 µM      | 0.5                       |
| <b>RIP</b>                               | 10 µM         | 0.2 µM      | 0.5                       |
| <b>FOP</b>                               | 10 µM         | 0.2 µM      | 0.5                       |
| <b>ROP</b>                               | 10 µM         | 0.2 µM      | 0.5                       |
| <b>Amplification of mutant Allele</b>    |               |             |                           |
| <b>FIP</b>                               | 10 µM         | 0.4 µM      | 1                         |
| <b>ROP</b>                               | 10 µM         | 0.4 µM      | 1                         |
| <b>Amplification of ancestral Allele</b> |               |             |                           |
| <b>RIP</b>                               | 10 µM         | 0.2 µM      | 1                         |
| <b>FOP</b>                               | 10 µM         | 0.4 µM      | 1                         |
| <b>Onetaq® 2x Master Mix</b>             | 2X            | 1X          | 12.5                      |
| <b>Nuclease Free water</b>               | -             | -           |                           |
| <b>DNA sample</b>                        | >50 ng/ µL    | >50 ng/ µL  | 1                         |

*FIP- forward inner primer; RIP- reverse inner primer; FOP; forward outer primer; ROP: reverse outer primer*

## Results of TCF7L2- rs7903146 and rs12255372 genotyping

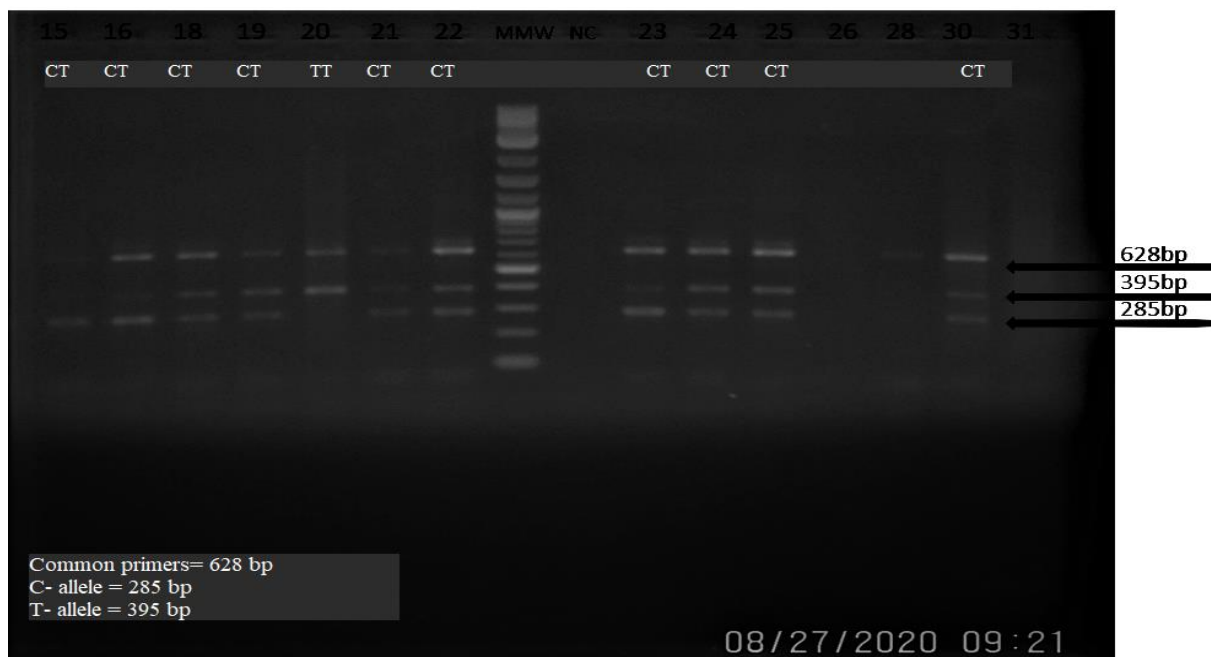

Figure S3: 2% agarose gel electrophoresis of TCF7L2- rs7903146

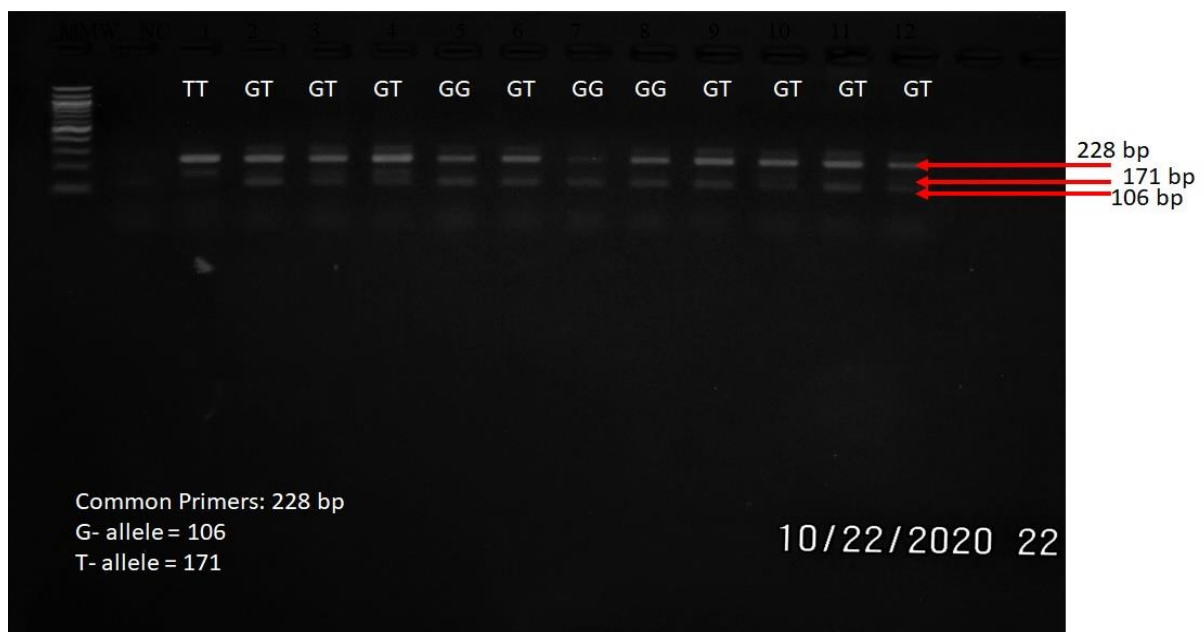

Figure S4: 2% agarose gel electrophoresis of TCF7L2- rs12255372

**Table S2: Association of TCF7L2 SNPs with Anthropometric and biochemical markers**

| Variables                | Wild type    | Mutant type  | P-value          |
|--------------------------|--------------|--------------|------------------|
| <b>rs7903146</b>         |              |              |                  |
| <b>Controls (N=110)</b>  |              |              |                  |
| BMI (Kg/m <sup>2</sup> ) | 26.14±5.40   | 26.07±3.45   | 0.924            |
| Systolic BP (mmHg)       | 120.96±19.15 | 121.49±17.96 | 0.142            |
| Diastolic BP (mmHg)      | 75.57±11.11  | 76.74±11.28  | 0.403            |
| Triglycerides (mmol/l)   | 1.31±0.33    | 1.27±0.61    | <b>0.048</b>     |
| T. Chol (mmol/l)         | 4.52±0.98    | 4.76±1.13    | 0.465            |
| HDL-C(mmol/l)            | 1.24±0.23    | 1.22±0.30    | 0.163            |
| LDL-C (mmol/l)           | 3.19±0.50    | 3.42±0.85    | <b>0.001</b>     |
| FPG (mmol/l)             | 4.63±0.75    | 5.02±0.98    | 0.069            |
| HbA1c (%)                | 4.81±0.52    | 4.85±0.66    | 0.981            |
| <b>Cases (N=106)</b>     |              |              |                  |
| BMI (Kg/m <sup>2</sup> ) | 28.62±5.71   | 28.04±5.49   | 0.160            |
| Systolic BP (mmHg)       | 138.19±21.46 | 131.78±19.05 | <b>0.015</b>     |
| Diastolic BP (mmHg)      | 84.65±12.93  | 83.36±11.39  | 0.450            |
| Triglycerides (mmol/l)   | 1.53±0.46    | 1.74±0.68    | 0.284            |
| T. Chol (mmol/l)         | 4.95±0.94    | 5.35±1.04    | 0.110            |
| HDL-C(mmol/l)            | 1.06±0.22    | 0.98±0.24    | 0.283            |
| LDL-C (mmol/l)           | 3.31±0.72    | 3.48±1.01    | <b>0.046</b>     |
| FPG (mmol/l)             | 7.38±4.52    | 9.16±4.64    | 0.414            |
| HbA1c (%)                | 6.23±1.49    | 7.24±1.92    | 0.099            |
| <b>rs12255372</b>        |              |              |                  |
| <b>Controls (N=110)</b>  |              |              |                  |
| BMI (Kg/m <sup>2</sup> ) | 25.72±4.64   | 27.17±3.53   | 0.493            |
| Systolic BP (mmHg)       | 121.56±17.90 | 120.41±21.10 | 0.145            |
| Diastolic BP (mmHg)      | 76.00±11.29  | 76.83±10.98  | 0.402            |
| Triglycerides (mmol/l)   | 1.20±0.36    | 1.54±0.72    | <b>0.003</b>     |
| T. Chol (mmol/l)         | 4.51±1.03    | 5.04±1.07    | <b>0.048</b>     |
| HDL-C(mmol/l)            | 1.24±0.26    | 1.21±0.31    | 0.122            |
| LDL-C (mmol/l)           | 3.27±0.61    | 3.45±0.99    | <b>0.001</b>     |
| FPG (mmol/l)             | 4.67±0.71    | 5.34±1.19    | <b>0.005</b>     |
| HbA1c (%)                | 4.72±0.55    | 5.17±0.63    | <b>&lt;0.001</b> |
| <b>Cases (N=106)</b>     |              |              |                  |
| BMI (Kg/m <sup>2</sup> ) | 27.54±6.00   | 29.05±4.75   | <b>0.044</b>     |
| Systolic BP (mmHg)       | 128.57±17.09 | 139.82±21.41 | <b>0.003</b>     |
| Diastolic BP (mmHg)      | 81.61±10.69  | 86.49±12.60  | 0.077            |
| Triglycerides (mmol/l)   | 1.63±0.57    | 1.77±0.71    | 0.476            |
| T. Chol (mmol/l)         | 5.30±1.09    | 5.18±0.95    | 0.339            |
| HDL-C(mmol/l)            | 1.02±0.26    | 0.96±0.19    | 0.459            |
| LDL-C (mmol/l)           | 3.48±0.99    | 3.38±0.89    | 0.061            |
| FPG (mmol/l)             | 8.47±4.31    | 9.06±5.12    | 0.935            |
| HbA1c (%)                | 6.69±1.52    | 7.40±2.21    | 0.078            |

*Mt- mutant type, Wt- wild type. Highlighted P-values are statistically significant.*

**Table S3: Logistic regression analysis of TCF7L2 SNPs associated with cardiometabolic risk factors**

| Variables                 | Wild type<br>(C-allele) | Mutant type<br>(T-allele) | aOR<br>(95%CI)     | P-<br>value  |
|---------------------------|-------------------------|---------------------------|--------------------|--------------|
| <b>rs7903146</b>          |                         |                           |                    |              |
| <b>Controls (N=110)</b>   |                         |                           |                    |              |
| High BP                   | 4 (8.2)                 | 6 (9.8)                   | 0.991 (0.25-3.96)  | 0.990        |
| High TC                   | 1 (2.0)                 | 5 (8.2)                   | 5.14 (0.57-46.67)  | 0.146        |
| High TG                   | 7 (14.3)                | 9 (14.8)                  | 0.93 (0.31-2.77)   | 0.890        |
| Low HDL-C                 | 24 (49.0)               | 28 (45.9)                 | 1.12 (0.46-2.73)   | 0.800        |
| High LDL-C                | 11 (22.4)               | 25 (41.0)                 | 2.98 (1.23-7.30)   | <b>0.017</b> |
| Atherogenic dyslipidaemia | 1 (2.0)                 | 4 (6.6)                   | 3.71 (0.39-35.43)  | 0.254        |
| Overweight/Obesity        | 23 (46.9)               | 37 (60.7)                 | 1.73 (0.78-3.76)   | 0.164        |
| MetS                      | 6 (12.2)                | 8 (13.1)                  | 1.02 (0.32-3.28)   | 0.969        |
| <b>Cases (N=106)</b>      |                         |                           |                    |              |
| High BP                   | 11 (42.3)               | 25 (31.3)                 | 0.62 (0.25-1.55)   | 0.307        |
| High TC                   | 1 (3.8)                 | 12 (15.0)                 | 4.46 (0.55-36.17)  | 0.162        |
| High TG                   | 10 (38.5)               | 51 (63.7)                 | 2.95 (1.16-7.50)   | <b>0.023</b> |
| Low HDL-C                 | 18 (69.2)               | 63 (78.8)                 | 1.73 (0.62-4.83)   | 0.299        |
| High LDL-C                | 13 (50.0)               | 51 (63.7)                 | 1.95 (0.75-5.10)   | 0.174        |
| Atherogenic dyslipidaemia | 7 (26.9)                | 37 (46.3)                 | 2.67 (0.95-7.52)   | 0.063        |
| Overweight/Obesity        | 16 (61.5)               | 56 (70.0)                 | 1.48 (0.58-3.79)   | 0.405        |
| MetS                      | 15 (57.7)               | 55 (68.8)                 | 1.70 (0.66-4.39)   | 0.272        |
| <b>rs12255372</b>         |                         |                           |                    |              |
| <b>Controls (N=110)</b>   |                         |                           |                    |              |
| High BP                   | 6 (7.4)                 | 4 (13.8)                  | 1.48 (0.35-6.45)   | 0.597        |
| High TC                   | 2 (2.5)                 | 4 (13.8)                  | 14.0 (1.43-137.32) | <b>0.023</b> |
| High TG                   | 9 (11.1)                | 7 (24.1)                  | 1.96 (0.64-6.02)   | 0.239        |
| Low HDL-C                 | 39 (48.1)               | 13 (44.8)                 | 1.41 (0.48-4.18)   | 0.533        |
| High LDL-C                | 23 (28.4)               | 13 (44.8)                 | 3.12 (1.14-8.56)   | <b>0.027</b> |
| Atherogenic dyslipidaemia | 4 (4.9)                 | 1 (3.4)                   | 0.65 (0.08-6.30)   | 0.710        |
| Overweight/Obesity        | 42 (51.9)               | 18 (62.1)                 | 1.55 (0.62-3.84)   | 0.348        |
| MetS                      | 7 (8.6)                 | 7 (24.1)                  | 2.91 (0.88-9.59)   | 0.080        |
| <b>Cases (N=106)</b>      |                         |                           |                    |              |
| High BP                   | 15 (24.6)               | 21 (46.7)                 | 3.01 (1.27-7.18)   | <b>0.013</b> |
| High TC                   | 8 (13.1)                | 5 (11.1)                  | 0.91 (0.27-3.09)   | 0.883        |
| High TG                   | 31 (50.8)               | 30 (66.7)                 | 1.89 (0.83-4.32)   | 0.131        |
| Low HDL-C                 | 45 (73.8)               | 36 (80.0)                 | 1.46 (0.56-3.88)   | 0.439        |
| High LDL-C                | 36 (41.0)               | 28 (62.2)                 | 1.24 (0.53-2.94)   | 0.622        |
| Atherogenic dyslipidaemia | 21 (34.4)               | 23 (51.1)                 | 2.17 (0.91-5.17)   | 0.082        |
| Overweight/Obesity        | 36 (59.0)               | 36 (80.0)                 | 3.33 (1.30-8.53)   | <b>0.012</b> |
| MetS                      | 37 (60.7)               | 33 (73.3)                 | 2.04 (0.84-4.97)   | 0.117        |

*Mt-* mutant type, *Wt-* wild type. Highlighted *P*-values are statistically significant. aOR-adjusted for age and sex

## Supplementary Appendix 2

### Logistic regression analysis to test association between rs7903146 and T2DM

#### Block 0: Beginning Block

**Classification Table<sup>a,b</sup>**

|        | Observed           |   | Predicted        |                  | Percentage Correct |
|--------|--------------------|---|------------------|------------------|--------------------|
|        |                    |   | T2DM Status<br>0 | T2DM Status<br>1 |                    |
| Step 0 | T2DM Status        | 0 | 110              | 0                | 100.0              |
|        |                    | 1 | 106              | 0                | .0                 |
|        | Overall Percentage |   |                  |                  | 50.9               |

a. Constant is included in the model.

b. The cut value is .500

**Variables in the Equation**

|        |          | B     | S.E. | Wald | df | Sig. | Exp(B) |
|--------|----------|-------|------|------|----|------|--------|
| Step 0 | Constant | -.037 | .136 | .074 | 1  | .786 | .964   |

**Variables not in the Equation**

|        |                    |              | Score  | df | Sig. |
|--------|--------------------|--------------|--------|----|------|
| Step 0 | Variables          | rs7903146    | 12.066 | 2  | .002 |
|        |                    | rs7903146(1) | 2.832  | 1  | .092 |
|        |                    | rs7903146(2) | 5.049  | 1  | .025 |
|        | Overall Statistics |              | 12.066 | 2  | .002 |

#### Block 1: Method = Enter

**Omnibus Tests of Model Coefficients**

|        |       | Chi-square | df | Sig. |
|--------|-------|------------|----|------|
| Step 1 | Step  | 12.354     | 2  | .002 |
|        | Block | 12.354     | 2  | .002 |
|        | Model | 12.354     | 2  | .002 |

**Model Summary**

| Step | -2 Log likelihood    | Cox & Snell R Square | Nagelkerke R Square |
|------|----------------------|----------------------|---------------------|
| 1    | 287.012 <sup>a</sup> | .056                 | .074                |

a. Estimation terminated at iteration number 4 because parameter estimates changed by less than .001.

**Hosmer and Lemeshow Test**

| Step | Chi-square | df | Sig.  |
|------|------------|----|-------|
| 1    | .000       | 1  | 1.000 |

**Contingency Table for Hosmer and Lemeshow Test**

|        |   | T2DM Status = 0 |          | T2DM Status = 1 |          | Total |
|--------|---|-----------------|----------|-----------------|----------|-------|
|        |   | Observed        | Expected | Observed        | Expected |       |
| Step 1 | 1 | 49              | 49.000   | 26              | 26.000   | 75    |



|   |    |        |    |        |     |
|---|----|--------|----|--------|-----|
| 2 | 56 | 56.000 | 66 | 66.000 | 122 |
| 3 | 5  | 5.000  | 14 | 14.000 | 19  |

**Classification Table<sup>a</sup>**

|        | Observed           | T2DM Status | Predicted |    | Percentage Correct |
|--------|--------------------|-------------|-----------|----|--------------------|
|        |                    |             | 0         | 1  |                    |
| Step 1 | T2DM Status        | 0           | 49        | 61 | 44.5               |
|        |                    | 1           | 26        | 80 | 75.5               |
|        | Overall Percentage |             |           |    | 59.7               |

a. The cut value is .500

**Variables in the Equation**

|                     | B               | S.E.         | Wald        | df           | Sig.        | Exp(B)      |
|---------------------|-----------------|--------------|-------------|--------------|-------------|-------------|
| Step 1 <sup>a</sup> | rs7903146       |              | 11.467      | 2            | .003        |             |
|                     | rs7903146(1)    | .798         | .303        | 6.931        | .008        | 2.221       |
|                     | rs7903146(2)    | 1.663        | .575        | 8.376        | .004        | 5.277       |
|                     | <b>Constant</b> | <b>-.634</b> | <b>.243</b> | <b>6.822</b> | <b>.009</b> | <b>.531</b> |

**Variables in the Equation**

|                     |              | 95% C.I. for EXP(B) |        |
|---------------------|--------------|---------------------|--------|
|                     |              | Lower               | Upper  |
| Step 1 <sup>a</sup> | rs7903146    |                     |        |
|                     | rs7903146(1) | 1.226               | 4.023  |
|                     | rs7903146(2) | 1.711               | 16.277 |
|                     | Constant     |                     |        |

a. Variable(s) entered on step 1: rs7903146.

## Block 2: Method = Enter

**Omnibus Tests of Model Coefficients**

|        |       | Chi-square | df | Sig. |
|--------|-------|------------|----|------|
| Step 1 | Step  | 1.468      | 1  | .226 |
|        | Block | 1.468      | 1  | .226 |
|        | Model | 13.821     | 3  | .003 |

**Model Summary**

| Step | -2 Log likelihood    | Cox & Snell R Square | Nagelkerke R Square |
|------|----------------------|----------------------|---------------------|
| 1    | 285.544 <sup>a</sup> | .062                 | .083                |

a. Estimation terminated at iteration number 4 because parameter estimates changed by less than .001.

**Hosmer and Lemeshow Test**

| Step | Chi-square | df | Sig. |
|------|------------|----|------|
| 1    | .255       | 3  | .968 |

**Contingency Table for Hosmer and Lemeshow Test**

|        |   | T2DM Status = 0 |          | T2DM Status = 1 |          | Total |
|--------|---|-----------------|----------|-----------------|----------|-------|
|        |   | Observed        | Expected | Observed        | Expected |       |
| Step 1 | 1 | 35              | 34.007   | 15              | 15.993   | 50    |
|        | 2 | 14              | 14.993   | 11              | 10.007   | 25    |
|        | 3 | 36              | 36.043   | 37              | 36.957   | 73    |

|   |    |        |    |        |    |
|---|----|--------|----|--------|----|
| 4 | 20 | 19.957 | 29 | 29.043 | 49 |
| 5 | 5  | 5.000  | 14 | 14.000 | 19 |

**Classification Table<sup>a</sup>**

|        | Observed           | Predicted        |                  | Percentage Correct |
|--------|--------------------|------------------|------------------|--------------------|
|        |                    | T2DM Status<br>0 | T2DM Status<br>1 |                    |
| Step 1 | T2DM Status        |                  |                  |                    |
|        | 0                  | 49               | 61               | 44.5               |
|        | 1                  | 26               | 80               | 75.5               |
|        | Overall Percentage |                  |                  | 59.7               |

**Variables in the Equation**

|                     |              | B     | S.E. | Wald   | df | Sig. | Exp(B) |
|---------------------|--------------|-------|------|--------|----|------|--------|
| Step 1 <sup>a</sup> | rs7903146    |       |      | 10.856 | 2  | .004 |        |
|                     | rs7903146(1) | .779  | .304 | 6.560  | 1  | .010 | 2.180  |
|                     | rs7903146(2) | 1.625 | .577 | 7.940  | 1  | .005 | 5.081  |
|                     | Sex(1)       | -.350 | .289 | 1.464  | 1  | .226 | .705   |
|                     | Constant     | -.404 | .307 | 1.739  | 1  | .187 | .667   |

**Variables in the Equation**

|                     |              | 95% C.I. for EXP(B) |        |
|---------------------|--------------|---------------------|--------|
|                     |              | Lower               | Upper  |
| Step 1 <sup>a</sup> | rs7903146    |                     |        |
|                     | rs7903146(1) | 1.201               | 3.959  |
|                     | rs7903146(2) | 1.640               | 15.738 |
|                     | Sex(1)       | .400                | 1.242  |
|                     | Constant     |                     |        |

### Block 3: Method = Forward Stepwise (Conditional)

#### Omnibus Tests of Model Coefficients

|        |       | Chi-square | df | Sig. |
|--------|-------|------------|----|------|
| Step 1 | Step  | 6.700      | 1  | .010 |
|        | Block | 6.700      | 1  | .010 |
|        | Model | 20.521     | 4  | .000 |

**Model Summary**

| Step | -2 Log likelihood    | Cox & Snell R Square | Nagelkerke R Square |
|------|----------------------|----------------------|---------------------|
| 1    | 278.845 <sup>a</sup> | .091                 | .121                |

a. Estimation terminated at iteration number 4 because parameter estimates changed by less than .001.

**Hosmer and Lemeshow Test**

| Step | Chi-square | df | Sig. |
|------|------------|----|------|
| 1    | 1.640      | 6  | .950 |

**Contingency Table for Hosmer and Lemeshow Test**

|        |   | T2DM Status = 0 |          | T2DM Status = 1 |          | Total |
|--------|---|-----------------|----------|-----------------|----------|-------|
|        |   | Observed        | Expected | Observed        | Expected |       |
| Step 1 | 1 | 27              | 27.041   | 10              | 9.959    | 37    |
|        | 2 | 11              | 12.384   | 8               | 6.616    | 19    |
|        | 3 | 30              | 30.499   | 26              | 25.501   | 56    |
|        | 4 | 8               | 6.932    | 5               | 6.068    | 13    |

|   |    |        |    |        |    |
|---|----|--------|----|--------|----|
| 5 | 18 | 16.720 | 19 | 20.280 | 37 |
| 6 | 9  | 8.334  | 14 | 14.666 | 23 |
| 7 | 4  | 5.410  | 15 | 13.590 | 19 |
| 8 | 3  | 2.680  | 9  | 9.320  | 12 |

**Classification Table<sup>a</sup>**

|        | Observed           | Predicted        |                  | Percentage Correct |
|--------|--------------------|------------------|------------------|--------------------|
|        |                    | T2DM Status<br>0 | T2DM Status<br>1 |                    |
| Step 1 | T2DM Status        |                  |                  |                    |
|        | 0                  | 76               | 34               | 69.1               |
|        | 1                  | 49               | 57               | 53.8               |
|        | Overall Percentage |                  |                  | 61.6               |

**Variables in the Equation**

|                     |                 | B            | S.E.        | Wald         | df       | Sig.        | Exp(B)       |
|---------------------|-----------------|--------------|-------------|--------------|----------|-------------|--------------|
| Step 1 <sup>a</sup> | rs7903146       |              |             | 11.494       | 2        | .003        |              |
|                     | rs7903146(1)    | .820         | .311        | 6.966        | 1        | .008        | 2.270        |
|                     | rs7903146(2)    | 1.701        | .584        | 8.471        | 1        | .004        | 5.479        |
|                     | <b>Sex(1)</b>   | <b>-.372</b> | <b>.294</b> | <b>1.600</b> | <b>1</b> | <b>.206</b> | <b>.689</b>  |
|                     | <b>Age (1)</b>  | <b>.866</b>  | <b>.341</b> | <b>6.449</b> | <b>1</b> | <b>.011</b> | <b>2.377</b> |
|                     | <b>Constant</b> | <b>-.627</b> | <b>.325</b> | <b>3.727</b> | <b>1</b> | <b>.054</b> | <b>.534</b>  |

**Variables in the Equation**

|                     |              | 95% C.I. for EXP(B) |        |
|---------------------|--------------|---------------------|--------|
|                     |              | Lower               | Upper  |
| Step 1 <sup>a</sup> | rs7903146    |                     |        |
|                     | rs7903146(1) | 1.235               | 4.174  |
|                     | rs7903146(2) | 1.743               | 17.222 |
|                     | Sex(1)       | .387                | 1.227  |
|                     | Age (1)      | 1.218               | 4.636  |
|                     | Constant     |                     |        |

**Model if Term Removed<sup>a</sup>**

| Variable   | Model Log Likelihood | Change in -2 Log Likelihood | df | Sig. of the Change |
|------------|----------------------|-----------------------------|----|--------------------|
| Step 1 Age | -142.779             | 6.714                       | 1  | .010               |

a. Based on conditional parameter estimates

## Logistic regression analysis to test association between rs12255372 and T2DM

### Block 0: Beginning Block

**Classification Table<sup>a,b</sup>**

|        |                    |   | Predicted        |   | Percentage Correct |
|--------|--------------------|---|------------------|---|--------------------|
|        |                    |   | T2DM Status<br>0 | 1 |                    |
| Step 0 | T2DM Status        | 0 | 110              | 0 | 100.0              |
|        |                    | 1 | 106              | 0 | .0                 |
|        | Overall Percentage |   |                  |   | 50.9               |

a. Constant is included in the model.

b. The cut value is .500

**Variables in the Equation**

|        |          | B     | S.E. | Wald | df | Sig. | Exp(B) |
|--------|----------|-------|------|------|----|------|--------|
| Step 0 | Constant | -.037 | .136 | .074 | 1  | .786 | .964   |

**Variables not in the Equation**

|        |                    |               | Score | df | Sig. |
|--------|--------------------|---------------|-------|----|------|
| Step 0 | Variables          | rs12255372    | 6.240 | 2  | .044 |
|        |                    | rs12255372(1) | 5.193 | 1  | .023 |
|        |                    | rs12255372(2) | .436  | 1  | .509 |
|        | Overall Statistics |               | 6.240 | 2  | .044 |

### Block 1: Method = Enter

**Omnibus Tests of Model Coefficients**

|        |       | Chi-square | df | Sig. |
|--------|-------|------------|----|------|
| Step 1 | Step  | 6.276      | 2  | .043 |
|        | Block | 6.276      | 2  | .043 |
|        | Model | 6.276      | 2  | .043 |

**Model Summary**

| Step | -2 Log likelihood    | Cox & Snell R Square | Nagelkerke R Square |
|------|----------------------|----------------------|---------------------|
| 1    | 293.090 <sup>a</sup> | .029                 | .038                |

a. Estimation terminated at iteration number 3 because parameter estimates changed by less than .001.

**Hosmer and Lemeshow Test**

| Step | Chi-square | df | Sig.  |
|------|------------|----|-------|
| 1    | .000       | 1  | 1.000 |

### Contingency Table for Hosmer and Lemeshow Test

|        |   | T2DM Status = 0 |          | T2DM Status = 1 |          | Total |
|--------|---|-----------------|----------|-----------------|----------|-------|
|        |   | Observed        | Expected | Observed        | Expected |       |
| Step 1 | 1 | 81              | 81.000   | 61              | 61.000   | 142   |
|        | 2 | 5               | 5.000    | 7               | 7.000    | 12    |
|        | 3 | 24              | 24.000   | 38              | 38.000   | 62    |

### Classification Table<sup>a</sup>

|          |                    | Predicted<br>T2DM Status |    | Percentage Correct |
|----------|--------------------|--------------------------|----|--------------------|
| Observed |                    | 0                        | 1  |                    |
| Step 1   | T2DM Status 0      | 81                       | 29 | 73.6               |
|          | 1                  | 61                       | 45 | 42.5               |
|          | Overall Percentage |                          |    | 58.3               |

a. The cut value is .500

### Variables in the Equation

|                     |               | B     | S.E. | Wald  | df | Sig. | Exp(B) |
|---------------------|---------------|-------|------|-------|----|------|--------|
| Step 1 <sup>a</sup> | rs12255372    |       |      | 6.148 | 2  | .046 |        |
|                     | rs12255372(1) | .743  | .311 | 5.709 | 1  | .017 | 2.102  |
|                     | rs12255372(2) | .620  | .610 | 1.035 | 1  | .309 | 1.859  |
|                     | Constant      | -.284 | .170 | 2.798 | 1  | .094 | .753   |

### Variables in the Equation

|                     |               | 95% C.I. for EXP(B) |       |
|---------------------|---------------|---------------------|-------|
|                     |               | Lower               | Upper |
| Step 1 <sup>a</sup> | rs12255372    |                     |       |
|                     | rs12255372(1) | 1.143               | 3.868 |
|                     | rs12255372(2) | .563                | 6.140 |
|                     | Constant      |                     |       |

a. Variable(s) entered on step 1: rs12255372.

## Block 2: Method = Enter

### Omnibus Tests of Model Coefficients

|        |       | Chi-square | df | Sig. |
|--------|-------|------------|----|------|
| Step 1 | Step  | 1.562      | 1  | .211 |
|        | Block | 1.562      | 1  | .211 |
|        | Model | 7.838      | 3  | .049 |

### Model Summary

| Step | -2 Log likelihood    | Cox & Snell R Square | Nagelkerke R Square |
|------|----------------------|----------------------|---------------------|
| 1    | 291.527 <sup>a</sup> | .036                 | .048                |

a. Estimation terminated at iteration number 3 because parameter estimates changed by less than .001.

### Hosmer and Lemeshow Test

| Step | Chi-square | df | Sig. |
|------|------------|----|------|
| 1    | .442       | 2  | .802 |

### Contingency Table for Hosmer and Lemeshow Test

|        |   | T2DM Status = 0 |          | T2DM Status = 1 |          | Total |
|--------|---|-----------------|----------|-----------------|----------|-------|
|        |   | Observed        | Expected | Observed        | Expected |       |
| Step 1 | 1 | 57              | 55.888   | 36              | 37.112   | 93    |
|        | 2 | 24              | 25.112   | 25              | 23.888   | 49    |
|        | 3 | 16              | 17.112   | 24              | 22.888   | 40    |
|        | 4 | 13              | 11.888   | 21              | 22.112   | 34    |

### Classification Table<sup>a</sup>

|                    |                         | Predicted<br>T2DM Status |    | Percentage Correct |
|--------------------|-------------------------|--------------------------|----|--------------------|
|                    |                         | 0                        | 1  |                    |
| Step 1             | Observed<br>T2DM Status | 0                        | 1  |                    |
|                    |                         | 81                       | 29 | 73.6               |
|                    |                         | 61                       | 45 | 42.5               |
| Overall Percentage |                         |                          |    | 58.3               |

a. The cut value is .500

### Variables in the Equation

|                     |               | B     | S.E. | Wald  | df | Sig. | Exp(B) |
|---------------------|---------------|-------|------|-------|----|------|--------|
| Step 1 <sup>a</sup> | rs12255372    |       |      | 5.560 | 2  | .062 |        |
|                     | rs12255372(1) | .722  | .312 | 5.340 | 1  | .021 | 2.058  |
|                     | rs12255372(2) | .508  | .618 | .677  | 1  | .411 | 1.663  |
|                     | Sex(1)        | -.359 | .288 | 1.558 | 1  | .212 | .698   |
|                     | Constant      | -.050 | .252 | .039  | 1  | .843 | .951   |

### Variables in the Equation

|                     |               | 95% C.I. for EXP(B) |       |
|---------------------|---------------|---------------------|-------|
|                     |               | Lower               | Upper |
| Step 1 <sup>a</sup> | rs12255372    |                     |       |
|                     | rs12255372(1) | 1.116               | 3.797 |
|                     | rs12255372(2) | .495                | 5.581 |
|                     | Sex(1)        | .397                | 1.227 |
|                     | Constant      |                     |       |

a. Variable(s) entered on step 1: Sex.

## Block 3: Method = Forward Stepwise (Conditional)

### Omnibus Tests of Model Coefficients

|        |       | Chi-square | df | Sig. |
|--------|-------|------------|----|------|
| Step 1 | Step  | 5.639      | 1  | .018 |
|        | Block | 5.639      | 1  | .018 |
|        | Model | 13.477     | 4  | .009 |

### Model Summary

| Step | -2 Log likelihood    | Cox & Snell R Square | Nagelkerke R Square |
|------|----------------------|----------------------|---------------------|
| 1    | 285.888 <sup>a</sup> | .060                 | .081                |

a. Estimation terminated at iteration number 3 because parameter estimates changed by less than .001.

### Hosmer and Lemeshow Test

| Step | Chi-square | df | Sig. |
|------|------------|----|------|
| 1    | 9.794      | 4  | .044 |

### Contingency Table for Hosmer and Lemeshow Test

|        |   | T2DM Status = 0 |          | T2DM Status = 1 |          | Total |
|--------|---|-----------------|----------|-----------------|----------|-------|
|        |   | Observed        | Expected | Observed        | Expected |       |
| Step 1 | 1 | 43              | 46.516   | 29              | 25.484   | 72    |
|        | 2 | 19              | 20.575   | 18              | 16.425   | 37    |
|        | 3 | 16              | 13.414   | 12              | 14.586   | 28    |
|        | 4 | 14              | 9.544    | 7               | 11.456   | 21    |
|        | 5 | 13              | 10.494   | 14              | 16.506   | 27    |
|        | 6 | 5               | 9.456    | 26              | 21.544   | 31    |

### Classification Table<sup>a</sup>

|                    |                         | Predicted<br>T2DM Status |    | Percentage Correct |
|--------------------|-------------------------|--------------------------|----|--------------------|
|                    |                         | 0                        | 1  |                    |
| Step 1             | Observed<br>T2DM Status |                          |    |                    |
|                    | 0                       | 62                       | 48 | 56.4               |
|                    | 1                       | 47                       | 59 | 55.7               |
| Overall Percentage |                         |                          |    | 56.0               |

a. The cut value is .500

### Variables in the Equation

|                     |               | B     | S.E. | Wald  | df | Sig. | Exp(B) |
|---------------------|---------------|-------|------|-------|----|------|--------|
| Step 1 <sup>a</sup> | rs12255372    |       |      | 5.272 | 2  | .072 |        |
|                     | rs12255372(1) | .694  | .317 | 4.812 | 1  | .028 | 2.002  |
|                     | rs12255372(2) | .632  | .625 | 1.025 | 1  | .311 | 1.882  |
|                     | Sex(1)        | -.376 | .292 | 1.666 | 1  | .197 | .686   |
|                     | Age (1)       | .784  | .335 | 5.473 | 1  | .019 | 2.191  |
|                     | Constant      | -.225 | .265 | .721  | 1  | .396 | .798   |

### Variables in the Equation

|                     |               | 95% C.I. for EXP(B) |       |
|---------------------|---------------|---------------------|-------|
|                     |               | Lower               | Upper |
| Step 1 <sup>a</sup> | rs12255372    |                     |       |
|                     | rs12255372(1) | 1.077               | 3.724 |
|                     | rs12255372(2) | .553                | 6.401 |

|  |          |       |       |
|--|----------|-------|-------|
|  | Sex(1)   | .387  | 1.216 |
|  | Age (1)  | 1.136 | 4.227 |
|  | Constant |       |       |

a. Variable(s) entered on step 1: Age .

| Model if Term Removed <sup>a</sup> |     |                      |                             |    |                    |
|------------------------------------|-----|----------------------|-----------------------------|----|--------------------|
| Variable                           |     | Model Log Likelihood | Change in -2 Log Likelihood | df | Sig. of the Change |
| Step 1                             | Age | -145.767             | 5.645                       | 1  | .018               |

a. Based on conditional parameter estimates
